1 **Title**

2

3 United States wildlife and wildlife product imports from 2000-2014

4

5 **Authors**

6

7 Evan A. Eskew<sup>1\*</sup>, Allison M. White<sup>1</sup>, Noam Ross<sup>1</sup>, Kristine M. Smith<sup>1</sup>, Katherine F. Smith<sup>2</sup>, Jon  
8 Paul Rodríguez<sup>3,4,5</sup>, Carlos Zambrana-Torrel<sup>1</sup>, William B. Karesh<sup>1</sup>, Peter Daszak<sup>1\*</sup>

9

10 **Affiliations**

11

12 <sup>1</sup> EcoHealth Alliance, 460 West 34<sup>th</sup> Street – Suite 1701, New York, New York, 10001 USA

13 <sup>2</sup> Department of Ecology and Evolutionary Biology, Division of Biology and Medicine, Brown  
14 University, Providence, Rhode Island, 02912 USA

15 <sup>3</sup> IUCN Species Survival Commission, Rue Mauverney 28, 1196 Gland, Switzerland

16 <sup>4</sup> Centro de Ecología, Instituto Venezolano de Investigaciones Científicas, Apartado 20632,  
17 Caracas 1020-A, Venezuela

18 <sup>5</sup> Provita, Apartado 47552, Caracas 1041-A, Venezuela

19

20 \* Corresponding author(s): Evan A. Eskew ([eskew@ecohealthalliance.org](mailto:eskew@ecohealthalliance.org)); Peter Daszak

21 ([daszak@ecohealthalliance.org](mailto:daszak@ecohealthalliance.org))

22

23

24  
25  
26  
27  
28  
29  
30  
31  
32  
33  
34  
35  
36  
37  
38  
39  
40  
41  
42  
43  
44  
45

## Abstract

The global wildlife trade network is a massive system that has been shown to threaten biodiversity conservation, introduce non-native species and pathogens, and cause chronic animal welfare concerns. Despite its scale and impact, comprehensive characterization of the global wildlife trade is hampered by data that are limited in their temporal or taxonomic scope and detail. To help fill this gap, we present data on 15 years of the importation of wildlife and their derived products into the United States (2000-2014), originally collected by the United States Fish and Wildlife Service. We curated and cleaned the data and added taxonomic information to improve data usability. These data include > 2 million wildlife or wildlife product shipments, representing > 60 biological classes and > 3.2 billion live organisms. These data will be broadly useful to both scientists and policymakers seeking to better understand the volume, sources, biological composition, and potential risks of the global wildlife trade.

46

## Background & Summary

47           The wildlife trade represents a major threat to the conservation of many species due to  
48 the harvest and depletion of wild populations for the purpose of trade in animals and/or their  
49 derived products<sup>1-6</sup>. Consequently, understanding trade patterns and drivers is essential to  
50 mitigating the negative effects of trade on ecosystems, including those on which humanity  
51 depends<sup>7</sup>. Characterization of the direct harvest and subsequent trade in wildlife is conceptually  
52 straightforward and should be aided by existing governmental monitoring programs. Currently,  
53 however, data on biological resource use are particularly scarce relative to information on other  
54 conservation threats, and the utility of existing datasets is often limited by a narrow taxonomic  
55 focus<sup>8</sup>. Furthermore, comprehensive evaluation of the wildlife trade at domestic and  
56 international scales is complicated by the existence of both legal trade pathways, which are  
57 subject to differing regulations and monitoring effort in different nations, and illegal trade  
58 pathways, which are under-detected and under-reported due to their illicit nature<sup>9,10</sup>. Finally,  
59 multi-country wildlife trade data sources, like the CITES Trade Database, can have reporting  
60 discrepancies and complex data structures that challenge analysis and interpretation<sup>11-15</sup>. Despite  
61 these difficulties, efforts to describe and quantify the wildlife trade have scientific value, given  
62 the trade's demonstrated impact on wildlife conservation status<sup>2-4,6</sup>, animal welfare<sup>16</sup>, the  
63 introduction of non-native species<sup>17-19</sup>, and the spread of non-native pathogens, including  
64 zoonoses that may threaten human health<sup>9,10,20,21</sup>.

65           The United States Fish and Wildlife Service's (USFWS) Law Enforcement Management  
66 Information System (LEMIS) data have been used as a resource for research on the legal wildlife  
67 trade. These data, derived from legally mandated reports submitted to USFWS<sup>10</sup>, contain  
68 information on US imports/exports of both live organisms and wildlife products. Previous

69 studies, having obtained LEMIS records through Freedom of Information Act (FOIA) requests,  
70 have used the data to address broad temporal and taxonomic patterns in the US wildlife trade<sup>7,10</sup>  
71 and trends in the trade of specific focal taxa<sup>15,22-24</sup>. However, the LEMIS trade data underlying  
72 analyses have either not been shared as part of the publication process, or the data that have been  
73 released focus on relatively limited time periods and study taxa. In addition, to the best of our  
74 knowledge, LEMIS data are not permanently archived<sup>10</sup>, and independent parties acquiring  
75 LEMIS data may obtain subtly different datasets depending upon the date and specifics of their  
76 data requests. These factors, combined with the time investment and domain-specific knowledge  
77 required to request, process, and interpret LEMIS records, are likely barriers to the wider use of  
78 LEMIS data and may muddle comparability among studies.

79 Here, we collate and share 15 years of USFWS LEMIS wildlife trade importation data.  
80 While previous studies have summarized different portions of these data<sup>7,10,22</sup>, the complete,  
81 cleaned dataset has not been released until now. Furthermore, we provide an R package interface  
82 for the dataset, aiming to streamline data access and ease the key initial analytical steps of data  
83 manipulation and visualization. This dataset will be of broad interest to researchers investigating  
84 the conservation impacts of overexploitation through trade, the introduction of alien species, and  
85 the potential health impact on humans, native wildlife, and domesticated species of the  
86 widespread transport of wildlife that may harbor pathogens of concern. Critically, it represents a  
87 single data resource that is relevant to researchers working across diverse taxonomic groups,  
88 allowing for greater comparability across wildlife trade work in the future.

## 89 **Methods**

90 On a consistent basis since the mid-2000s, we have filed FOIA requests to USFWS for  
91 LEMIS data concerning importation of wildlife and wildlife products from all countries, noting

92 that we were interested in both legal and illegal products that were documented and/or seized by  
93 US authorities. Specifically, we requested: taxonomic information (i.e., species identity or  
94 lowest-level taxonomic identification available), value of the product (reported in US dollars),  
95 wildlife description (i.e., type of wildlife product such as “live” or “skin”), quantity, unit (of the  
96 quantity metric), country of origin, country of shipment, action taken by USFWS on import, final  
97 disposition decision, date of disposition, date of shipment, the US port where the product was  
98 received, the US importer, and the foreign exporter (Table 1). At the time of writing, these  
99 requests have generated 15 years of US wildlife importation data spanning from 2000 through  
100 2014<sup>25</sup>. As we continue to file requests for LEMIS data, the version-controlled Zenodo data  
101 repository and R package will be updated accordingly.

102 Data processing is described here only in broad outline both for brevity and because the  
103 entire data cleaning workflow is publicly available for inspection (see “Code availability” section  
104 below). Raw LEMIS data were provided by the USFWS as Microsoft Excel files, and file  
105 structure varied slightly across request responses. We aggregated these data into a single  
106 database, and performed a variety of quality assurance and data cleaning operations to improve  
107 data integrity and usability. All data processing and cleaning took place within the R statistical  
108 programming environment<sup>26</sup>.

109 First, we harmonized data indicating missingness and other uninterpretable field values  
110 (i.e., “\*\*\*”) to the standard missing data value in R (i.e., NA values). Although our data requests  
111 specified our interest in imported wildlife or wildlife products, a small proportion of the data we  
112 received (< 5%) did not contain values of “I” (indicating “import”) in the ‘import\_export’ data  
113 field. Because we couldn’t confidently assess whether these records represented imported  
114 products, we removed them from the dataset. We also discovered a subset of records from one

115 shipment year (2013) that were composed of near-duplicate records. These comprised rows that  
116 were exact duplicates of one another except for the ‘value’ field; one portion of the data for these  
117 near-duplicate matches recorded missing data for the ‘value’ field, while the other portion  
118 recorded numeric values. Given that all of the records containing missing ‘value’ data in this  
119 near-duplicate set were from the same raw data file, we deduced that we received duplicated  
120 information for this set of records, with one version of the records containing the ‘value’ data  
121 that was missing in the other. We removed the near-duplicate records that contained missing  
122 ‘value’ data, retaining the near-duplicates with good ‘value’ data.

123 We then cleaned data fields that should have been restricted to specific, coded values,  
124 comparing the values observed in the raw data with valid codes as indicated by USFWS code  
125 key documentation (available in our code repository). We converted irregular code entries to  
126 valid codes where it was possible to do so with reasonable confidence given the data context. In  
127 some cases, irregular code entries were apparent typographic errors. For example, in the  
128 ‘description’ field, “MEA” is the code used to indicate a meat product. We therefore assumed  
129 that records with a ‘description’ entry of “MAE” and a declared unit of kilograms were likely  
130 erroneous entries of the valid code “MEA”. In other cases, irregular codes seemed to be data  
131 entry errors resulting from subtle differences between commonly used abbreviations and the  
132 actual, valid codes for LEMIS data. For example, valid codes for the ‘unit’ field are two  
133 characters long; we thus assumed any ‘unit’ entries of “L” were meant to indicate a unit of liters,  
134 which should be expressed with the valid code “LT”. When we were unable to reasonably infer a  
135 particular data entry error, we converted irregular codes to a value of “non-standard value”. We  
136 also generated a ‘cleaning\_notes’ field in the final dataset which preserves the original values  
137 that were converted to “non-standard value” for users who wish to attempt interpretation of the

138 raw data. The following fields were cleaned in this manner: ‘description’, ‘unit’,  
139 ‘country\_origin’, ‘country\_imp\_exp’, ‘purpose’, ‘source’, ‘action’, ‘disposition’, and ‘port’  
140 (Table 1).

141 Next, we attempted to clean disposition date data. While the shipment dates in the raw  
142 data we received were strictly within the bounds of the years requested (i.e., 2000-2014), likely  
143 because this field was used by the USFWS to pull the data, the disposition date field was more  
144 varied. Some disposition date entries were obviously erroneous (e.g., those listing dates in the  
145 future) while others were likely artifacts resulting from data storage and sharing processes (e.g.,  
146 when using Microsoft Excel files, blank values in date-formatted fields can sometimes be  
147 converted to unintended default date values). The vast majority of raw records in the dataset (>  
148 95%) list a disposition date identical to or later than the shipment date. Because logically a  
149 disposition decision should occur after a product is received, where there were obvious conflicts  
150 between the shipment date and disposition date, we assumed disposition dates should refer to a  
151 date on or after the shipment date. Thus, we cleaned all obviously problematic disposition dates,  
152 particularly those lying outside the time period 2000-2014. Note, however, that disposition dates  
153 in 2015 may be sensible and valid for shipments received late in 2014.

154 Next, we cleaned and supplemented taxonomic information in the LEMIS data. Using the  
155 provided ‘species\_code’ field and USFWS keys, we were able to derive a ‘taxa’ field for the vast  
156 majority (> 97%) of records (Table 1). However, this USFWS-defined ‘taxa’ categorization,  
157 while useful for general data inspection, does not correspond to a consistent taxonomic concept.  
158 Therefore, we sought to designate a taxonomic class for all LEMIS data where possible. We used  
159 the R package ‘taxadb’ to automatically gather class information<sup>27</sup>, drawing primarily from the  
160 taxonomic classification provided by the Catalogue of Life (COL) database. Where the COL data

161 did not allow for automated class-level taxonomic calls, we drew from the Integrated Taxonomic  
162 Information System (ITIS), harmonizing data with the COL class categorization. Furthermore,  
163 the lack of automatic class-level taxonomic assignment for some taxonomic entries alerted us to  
164 raw values potentially in need of correction, initiating an iterative data cleaning process. First, as  
165 part of this cleaning, vague or missing taxonomic information in the ‘species’ and ‘subspecies’  
166 fields were converted to “sp.” values for consistency. Next, we manually inspected and corrected  
167 unique combinations of the ‘genus’, ‘species’, ‘subspecies’, ‘specific\_name’, and  
168 ‘generic\_name’ fields (Table 1). In many cases, errors represented minor misspellings (e.g.,  
169 *Philetarius socius* instead of *Philetairus socius*) or inversions of the genus and species names.  
170 Finally, where we were still unable to recover automated class-level information, we manually  
171 assigned class when data specificity and context from other fields allowed. Many of these data  
172 represented cases where the LEMIS data uses alternate taxonomy that is not recognized by either  
173 the COL or the ITIS. Nonetheless, the data provided often enabled unambiguous class-level  
174 assignment.

### 175 **Code availability**

176 Our custom R package, which provides access to the data described here, is publicly  
177 available at <https://github.com/ecohealthalliance/lemis>. Installation of the package and  
178 subsequent download of the data enables efficient, on-disk manipulation of the entire cleaned  
179 dataset<sup>28,29</sup>. Basic package usage is outlined in the main package README file on the GitHub  
180 site. The code implementation of the data cleaning process described above is also available in  
181 the package codebase (via the ‘data-raw’ directory) and is outlined in the associated developer  
182 README file. These scripts span the entirety of our data processing and cleaning workflow,  
183 from importation and collation of the raw USFWS LEMIS data files through to generation of the



184 single, cleaned data file as discussed in this manuscript. Thus, the scripts serve as transparent,  
185 reproducible documentation of our data processing in full.

## 186 **Data Records**

187 We present over > 5.5 million USFWS LEMIS wildlife or wildlife product records  
188 spanning 15 years and 28 data fields<sup>25</sup>. These records were derived from > 2 million unique  
189 shipments processed by USFWS during the time period and represent > 3.2 billion live  
190 organisms (Fig. 1). We provide the final cleaned data as a single comma-separated value file.  
191 Original raw data as provided by the USFWS are also available in the data repository. Although  
192 relatively large (~1 gigabyte), the cleaned data file can be imported into a software environment  
193 of choice for data analysis. Alternatively, our R package provides access to a release of the same  
194 cleaned dataset but with a data download and manipulation framework that is designed to work  
195 well with this large dataset, as previously described.

196 Twenty-three of the final data fields are cleaned versions of the original data provided by  
197 the USFWS: ‘control\_number’, ‘species\_code’, ‘genus’, ‘species’, ‘subspecies’,  
198 ‘specific\_name’, ‘generic\_name’, ‘description’, ‘quantity’, ‘unit’, ‘value’, ‘country\_origin’,  
199 ‘country\_imp\_exp’, ‘purpose’, ‘source’, ‘action’, ‘disposition’, ‘disposition\_date’,  
200 ‘shipment\_date’, ‘import\_export’, ‘port’, ‘us\_co’, and ‘foreign\_co’ (Table 1). To these original  
201 data fields, we added five: ‘taxa’, ‘class’, and ‘cleaning\_notes’ (all as previously described), as  
202 well as ‘dispostion\_year’ and ‘shipment\_year’ (derived from ‘disposition\_date’ and  
203 ‘shipment\_date’, respectively). To briefly describe the LEMIS data fields, we consider  
204 ‘control\_number’ to represent a unique individual shipment processed by the USFWS (Fig. 1).  
205 Different wildlife products contained within the same shipment may be represented in the  
206 LEMIS data by multiple data rows, all of which share a common ‘control\_number’. Consistent

207 with this interpretation, all rows of data sharing the same ‘control\_number’ share the same  
208 country of shipment and shipment date. Different products within the same shipment may differ  
209 in other ways, however. For example, they may have been originally derived from different  
210 countries and may have different disposition histories. Next, the ‘species\_code’, ‘taxa’, ‘class’,  
211 ‘genus’, ‘species’, ‘subspecies’, ‘specific\_name’, and ‘generic\_name’ columns all provide  
212 information serving to identify the wildlife or wildlife product (Table 1). While the ‘genus’  
213 column largely corresponds to taxonomic genus, sometimes higher-level categorizations were  
214 provided in this field, apparently when the genus was unknown. Using our automated taxonomic  
215 calling workflow, we were able to assign ‘class’ information to > 92% of LEMIS records. All  
216 further data fields besides ‘cleaning\_notes’ serve to detail the wildlife product, as outlined in  
217 Table 1. Note that although we consistently requested product ‘value’ information from the  
218 USFWS, it was not provided for four years of LEMIS data (2008-2010 and 2014).

### 219 **Technical Validation**

220 Following data cleaning, which primarily aimed to ensure that all relevant data fields  
221 contained valid USFWS-defined codes, we validated our final dataset by plotting the distribution  
222 of unique values and value string lengths across all data fields. These checks serve to verify that  
223 fields only contain expected values/codes and that the string length of entries in free text fields  
224 (e.g., ‘genus’, ‘species’) were not abnormally short or long, which could indicate problematic  
225 entries.

### 226 **Usage Notes**

227 While we did remove what we believe to be erroneous near-duplicate records in the  
228 dataset (as described in the Methods), end users should note that exact duplicate records remain.  
229 This is because even exact duplicate records may represent accurate data, especially in cases

230 where the recorded ‘quantity’ value is 1. For example, in the final dataset, ‘control\_number’  
231 2000732392 records the importation of a shipment of garments from France which were  
232 themselves derived from reticulated pythons (*Python reticulatus*) originating in Malaysia. Within  
233 this ‘control\_number’ value (representing one shipment), one data record, reporting a ‘quantity’  
234 of 1 and a ‘value’ of \$1,458, is duplicated 25 times. Our assumption is that these garments, and  
235 similar duplicate products, were individually packaged but shipped together such that officers at  
236 the port of entry recorded exact duplicate data entries to capture the total product volume within  
237 the shipment. In other cases, similar information may have been aggregated during data entry  
238 (e.g., recording the identical product data as a single record with a quantity of 25). We verified  
239 that all duplicate records that remain in the data originated from the same raw data file. This  
240 indicates that these records were provided as such by USFWS and ensures they were not artifacts  
241 generated through our data processing pipeline (e.g., by combining data across multiple raw data  
242 files that contained overlapping information). Thus, we believe we have made the most  
243 conservative data processing decision by preserving the original form of the data unless we had  
244 good reason to perform data cleaning. Nevertheless, users should be aware of the potential  
245 presence of duplicate records in any data subset of interest, and these records should be  
246 scrutinized for inclusion in analyses given the specific study objectives.

247         The dataset provides multiple, complementary data fields reporting taxonomic identity  
248 that deserve special attention. Generally, users will want to consider the ‘taxa’ and ‘class’ fields  
249 in conjunction to analyze trade data for large taxonomic groups. While ‘class’ is typically a more  
250 specific taxonomic designation, ‘taxa’ has fewer missing values in the final dataset (‘class’  
251 information available for > 92% of LEMIS records; ‘taxa’ information available for > 97% of  
252 LEMIS records). Which field deserves greater focus will depend on the analytical goals. For

253 example, the ‘taxa’ category “fish” encompasses LEMIS records representing six distinct ‘class’  
254 values: Actinopterygii, Cephalaspidomorphi, Elasmobranchii, Holocephali, Myxini, and  
255 Sarcopterygii. Clearly, ‘class’ is biologically meaningful and may help users rapidly narrow their  
256 analytical focus, but users should keep in mind that there are records within the ‘taxa’ category  
257 of “fish” for which ‘class’ could not be unambiguously assigned. For some research questions,  
258 these data may also be of interest.

259 In addition, users must be cognizant of the fact that taxa may be represented by multiple  
260 taxonomic synonyms. While we sought to provide high-level taxonomic information (e.g., class  
261 assignments) that would help users in generating a relevant data subset for analysis, we did not  
262 attempt to synonymize species-level names given the large number of taxa present in the LEMIS  
263 data and the constantly shifting (and contentious) landscape of preferred taxonomic  
264 nomenclature. End users will need to apply their expertise on taxa of interest in order to generate  
265 sound taxonomic delineations where synonymies exist in the data.

266 Furthermore, data users should be cautious about their interpretation of the  
267 ‘shipment\_date’ and ‘disposition\_date’ fields. As previously mentioned, while ‘shipment\_date’  
268 entries within the raw data we received fell completely within the time period of 2000-2014,  
269 ‘disposition\_date’ ranged more widely. Even following data cleaning to harmonize  
270 ‘disposition\_date’ entries that were obviously problematic, significant discrepancies between  
271 ‘shipment\_date’ and ‘disposition\_date’ still exist for some records in the final dataset. We have  
272 chosen to preserve these data as is there is no clear cut-off at which differences between  
273 disposition date and shipment date become invalid. For example, dispositions that occur months  
274 after the declared shipment date could reflect the reality of product processing even though a  
275 large majority of records (> 70%) indicate that disposition typically occurs within a week of the

276 shipment date. Certainly, users should be wary of any disposition date values that precede the  
277 associated shipment date, as we are unaware how this could represent an accurate accounting of  
278 the product disposition process. However, for many potential analyses, differences in the date  
279 fields may not be a significant cause for concern because ‘shipment\_date’ alone provides a sound  
280 index for those interested in temporal trends in wildlife trade.

281 Finally, data users should be careful about interpreting the ‘country\_imp\_exp’ and  
282 ‘country\_origin’ data fields. These fields are meant to represent the most recent location  
283 (‘country\_imp\_exp’) and point of origin (‘country\_origin’) for the wildlife or wildlife products,  
284 but data in these fields are derived from import documents completed by the importer and are  
285 therefore not verifiable. Complex import/export histories can result in surprising entries for these  
286 fields <sup>21</sup>. For example, rodents of the genus *Abrocoma* are native to South America. However,  
287 our data describe a shipment of garments derived from *Abrocoma* sp.  
288 (‘control\_number’ 2008273877) with a ‘country\_imp\_exp’ of Switzerland and a  
289 ‘country\_origin’ of Hungary. The apparent contradiction in this case is resolved by recognizing  
290 that the ‘source’ column indicates these animals were derived from a domestic ranching  
291 operation rather than being taken directly from the wild. However, for those interested in the true  
292 origins of wildlife and wildlife products that are sourced from the wild (~78% of our data  
293 records), the ‘country\_origin’ field deserves special scrutiny to ensure the recorded country is in  
294 fact a biologically-realistic point of origin for the species in question.

295 Understanding the appropriate interpretation of the ‘country\_imp\_exp’ and  
296 ‘country\_origin’ fields also illuminates how seemingly incongruous records listing the US as the  
297 ‘country\_origin’ for a US importation can in fact be valid data. For example, ‘control\_number’  
298 2005537093 represents a shipment of shoe products derived from white-tailed deer (*Odocoileus*

299 *virginianus*). The ‘country\_origin’ is recorded as the US, where the wildlife was presumably  
300 originally harvested, while Italy is recorded as the ‘country\_imp\_exp’ since this was the  
301 proximate source of the shoe products. Hence, for wildlife products where some part of the  
302 manufacturing process takes place abroad, it is indeed expected that raw materials derived from  
303 US wildlife are shipped internationally, thereby resulting in LEMIS data that indicate the US  
304 importation of a wildlife product that was originally sourced from the US.

305

306

### Acknowledgements

307 The authors wish to express their sincere thanks to the United States Fish and Wildlife  
308 Service and the numerous employees whose prompt, professional service over the years has  
309 helped make this data more widely available to the scientific community. The work in this paper  
310 was supported by: a National Science Foundation Human and Social Dynamics ‘Agents of  
311 Change’ award (SES-HSD-AOC “Human-Related Factors Affecting Emerging Infectious  
312 Diseases”, BCS-0826779 and BCS-0826840); a National Institutes of Health NIGMS grant  
313 (1R01GM100471-01, “MASpread”); a Joint NSF-NIH-USDA/BBSRC Ecology and Evolution  
314 of Infectious Diseases award (NSF DEB 1414374, BBSRC BB/M008894/1, “US-UK Collab:  
315 Risks of Animal and Plant Infectious Diseases through Trade (RAPID Trade)”); the United  
316 States Agency for International Development (USAID) Emerging Pandemic Threats PREDICT  
317 project; and core funding from EcoHealth Alliance.

318

319

### Author Contributions

320 K.M.S., A.M.W., K.F.S., J.P.R., C.Z.-T., W.B.K., and P.D. designed, drafted, and filed  
321 Freedom of Information Act requests. E.A.E., A.M.W., and C.Z-T. made key contributions to the

322 LEMIS data processing and cleaning workflow. N.R. developed and maintains the R package for  
323 data access. E.A.E. drafted the manuscript, and all authors were involved in editing and  
324 approving the final manuscript.

325

### 326 **Competing Interests**

327 The authors declare no competing interests.

328

329

330

331

332

333

334

335

336

337

338

339

340

341

342

343

344

345  
346  
347  
348  
349  
350  
351  
352  
353  
354  
355  
356  
357  
358  
359  
360  
361  
362  
363  
364  
365  
366

## References

- 1 Bennett, E. L. *et al.* Hunting the world's wildlife to extinction. *Oryx* **36**, 328-329, doi:10.1017/S0030605302000637 (2002).
- 2 Rosser, A. M. & Mainka, S. A. Overexploitation and species extinctions. *Conserv. Biol.* **16**, 584-586, doi:10.1046/j.1523-1739.2002.01635.x (2002).
- 3 Hoffmann, M. *et al.* The impact of conservation on the status of the world's vertebrates. *Science* **330**, 1503-1509, doi:10.1126/science.1194442 (2010).
- 4 Maxwell, S. L., Fuller, R. A., Brooks, T. M. & Watson, J. E. M. Biodiversity: The ravages of guns, nets and bulldozers. *Nature* **536**, 143-145, doi:10.1038/536143a (2016).
- 5 Ripple, W. J. *et al.* Bushmeat hunting and extinction risk to the world's mammals. *Roy. Soc. Open Sci.* **3**, 160498, doi:10.1098/rsos.160498 (2016).
- 6 Tingley, M. W., Harris, J. B. C., Hua, F., Wilcove, D. S. & Yong, D. L. The pet trade's role in defaunation. *Science* **356**, 916, doi:10.1126/science.aan5158 (2017).
- 7 Smith, K. F. *et al.* Reducing the risks of the wildlife trade. *Science* **324**, 594-595, doi:10.1126/science.1174460 (2009).
- 8 Joppa, L. N. *et al.* Filling in biodiversity threat gaps. *Science* **352**, 416-418, doi:10.1126/science.aaf3565 (2016).
- 9 Rosen, G. E. & Smith, K. F. Summarizing the evidence on the international trade in illegal wildlife. *EcoHealth* **7**, 24-32, doi:10.1007/s10393-010-0317-y (2010).
- 10 Smith, K. M. *et al.* Summarizing US wildlife trade with an eye toward assessing the risk of infectious disease introduction. *EcoHealth* **14**, 29-39, doi:10.1007/s10393-017-1211-7 (2017).



- 367 11 Blundell, A. G. & Mascia, M. B. Discrepancies in reported levels of international wildlife  
368 trade. *Conserv. Biol.* **19**, 2020-2025, doi:10.1111/j.1523-1739.2005.00253.x (2005).
- 369 12 Berec, M., Vršecká, L. & Šetlíková, I. What is the reality of wildlife trade volume?  
370 CITES Trade Database limitations. *Biol. Conserv.* **224**, 111-116,  
371 doi:10.1016/j.biocon.2018.05.025 (2018).
- 372 13 Robinson, J. E. & Sinovas, P. Challenges of analyzing the global trade in CITES-listed  
373 wildlife. *Conserv. Biol.* **32**, 1203–1206, doi:10.1111/cobi.13095 (2018).
- 374 14 Eskew, E. A., Ross, N., Zambrana-Torrel, C. & Karesh, W. B. The CITES Trade  
375 Database is not a “global snapshot” of legal wildlife trade: Response to Can et al., 2019.  
376 *Glob. Ecol. Conserv.* **18**, e00631, doi:10.1016/j.gecco.2019.e00631 (2019).
- 377 15 Janssen, J. & Leupen, B. T. C. Traded under the radar: poor documentation of trade in  
378 nationally-protected non-CITES species can cause fraudulent trade to go undetected.  
379 *Biodivers. Conserv.* **28**, 2797-2804, doi:10.1007/s10531-019-01796-7 (2019).
- 380 16 Baker, S. E. *et al.* Rough trade: animal welfare in the global wildlife trade. *BioScience*  
381 **63**, 928-938, doi:10.1525/bio.2013.63.12.6 (2013).
- 382 17 Hulme, P. E. Trade, transport and trouble: managing invasive species pathways in an era  
383 of globalization. *J. Appl. Ecol.* **46**, 10-18, doi:10.1111/j.1365-2664.2008.01600.x (2009).
- 384 18 Chapman, D., Purse, B. V., Roy, H. E. & Bullock, J. M. Global trade networks determine  
385 the distribution of invasive non-native species. *Glob. Ecol. Biogeogr.* **26**, 907-917,  
386 doi:10.1111/geb.12599 (2017).
- 387 19 García-Díaz, P., Ross, J. V., Woolnough, A. P. & Cassey, P. The illegal wildlife trade is a  
388 likely source of alien species. *Conserv. Lett.* **10**, 690-698, doi:10.1111/conl.12301 (2017).

- 389 20 Karesh, W. B., Cook, R. A., Bennett, E. L. & Newcomb, J. Wildlife trade and global  
390 disease emergence. *Emerg. Infect. Dis.* **11**, 1000-1002, doi:10.3201/eid1107.050194  
391 (2005).
- 392 21 Pavlin, B. I., Schloegel, L. M. & Daszak, P. Risk of importing zoonotic diseases through  
393 wildlife trade, United States. *Emerg. Infect. Dis.* **15**, 1721-1726,  
394 doi:10.3201/eid1511.090467 (2009).
- 395 22 Schloegel, L. M. *et al.* Magnitude of the US trade in amphibians and presence of  
396 *Batrachochytrium dendrobatidis* and ranavirus infection in imported North American  
397 bullfrogs (*Rana catesbeiana*). *Biol. Conserv.* **142**, 1420–1426,  
398 doi:10.1016/j.biocon.2009.02.007 (2009).
- 399 23 Herrel, A. & van der Meijden, A. An analysis of the live reptile and amphibian trade in  
400 the USA compared to the global trade in endangered species. *Herpetol. J.* **24**, 103-110  
401 (2014).
- 402 24 Gray, M. J. *et al.* *Batrachochytrium salamandrivorans*: the North American response and  
403 a call for action. *PLoS Pathog.* **11**, e1005251, doi:10.1371/journal.ppat.1005251 (2015).
- 404 25 Eskew, E. A. *et al.* United States LEMIS wildlife trade data curated by EcoHealth  
405 Alliance (Version 1.0.0). *Zenodo*, doi:10.5281/zenodo.3387661 (2019).
- 406 26 R Core Team. R: a language and environment for statistical computing. R Foundation for  
407 Statistical Computing, Vienna, Austria. (2019). <https://www.R-project.org/>.
- 408 27 Boettiger, C., Norman, K., Poelen, J. & Chamberlain, S. taxadb: a high-performance local  
409 taxonomic database interface. R package version 0.0.1 (2019).  
410 <https://github.com/cboettig/taxadb>.

411 28 Klik, M. fst: lightning fast serialization of data frames for R. R package version 0.9.0  
412 (2019). <https://CRAN.R-project.org/package=fst>.  
413 29 Müller, K. fstplyr: a ‘dplyr’ interface to ‘fst’ (2018). <https://github.com/krlmlr/fstplyr>.  
414  
415  
416  
417  
418  
419  
420  
421  
422  
423  
424  
425  
426  
427  
428  
429  
430  
431  
432

433 **Figure 1. Number of unique shipments (a) and number of live organisms (b) imported per**  
434 **month in the LEMIS wildlife trade data from 2000 through 2014.** We defined shipments as  
435 synonymous with the LEMIS data field ‘control\_number’. Each shipment may contain multiple  
436 types of wildlife products and thus be recorded over multiple rows in the data. Note that the  
437 spikes in live organism imports in 2001 and 2002 are driven by extremely large recorded  
438 shipments (> 5 million individuals) of tropical fish and crustaceans (*Penaeus* sp.).

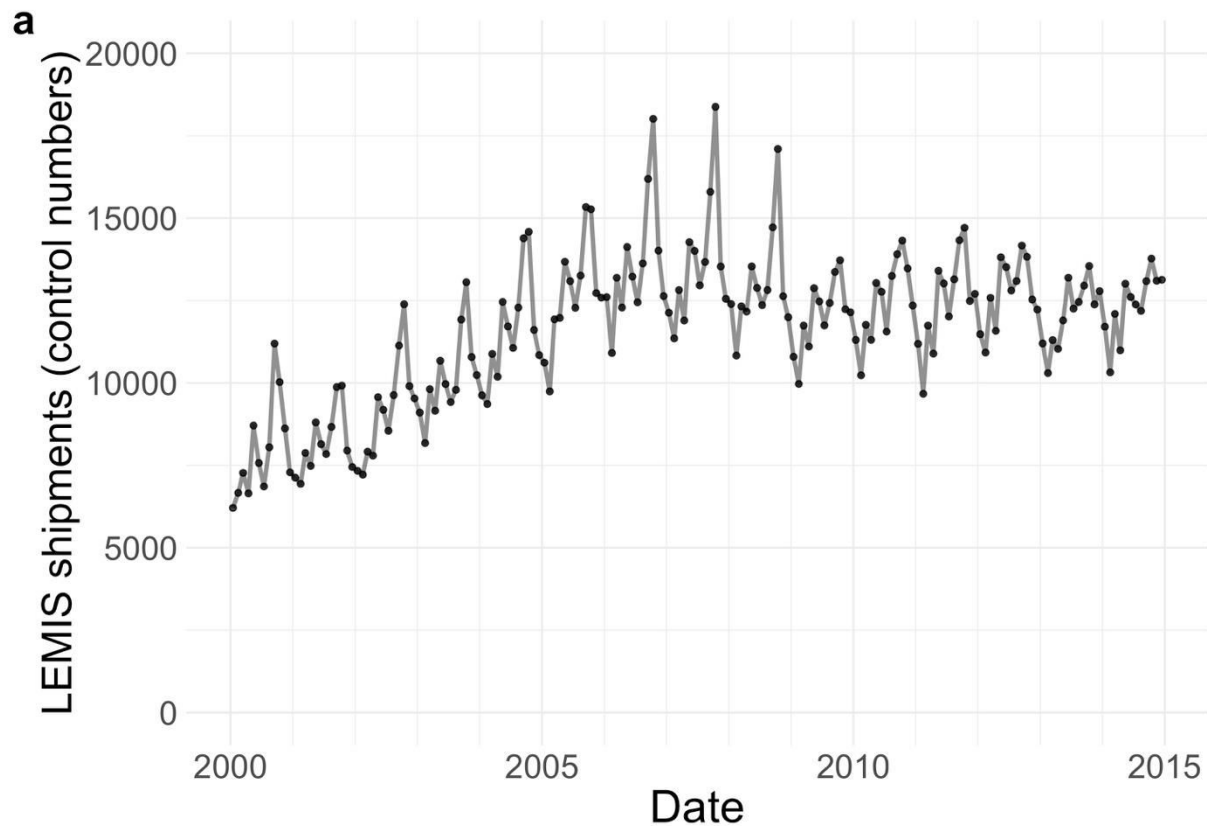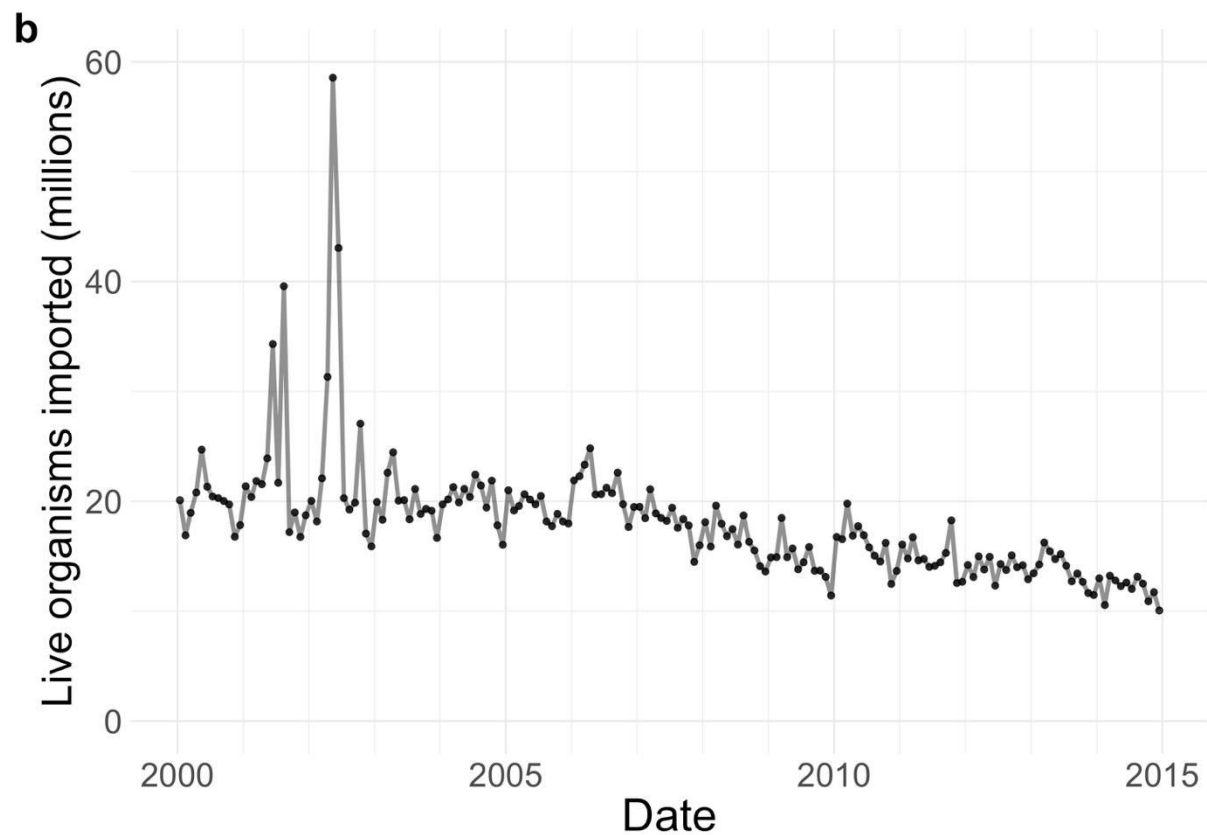

440 **Table 1. LEMIS metadata showing data fields and field descriptions for all variables**  
441 **appearing in the cleaned dataset.** EHA = EcoHealth Alliance, USFWS = United States Fish  
442 and Wildlife Service.

443

| <b>Field</b>     | <b>Description</b>                                                 |
|------------------|--------------------------------------------------------------------|
| control_number   | Shipment ID number                                                 |
| species_code     | USFWS code for the wildlife product                                |
| taxa             | USFWS-derived broad taxonomic categorization                       |
| class            | EHA-derived class-level taxonomic designation                      |
| genus            | Genus (or higher-level taxonomic name) of the wildlife product     |
| species          | Species of the wildlife product                                    |
| subspecies       | Subspecies of the wildlife product                                 |
| specific_name    | A specific common name for the wildlife product                    |
| generic_name     | A general common name for the wildlife product                     |
| description      | Type/form of the wildlife product                                  |
| quantity         | Numeric quantity of the wildlife product                           |
| unit             | Unit for the numeric quantity                                      |
| value            | Reported value of the wildlife product in US dollars               |
| country_origin   | Code for the country of origin of the wildlife product             |
| country_imp_exp  | Code for the country to/from which the wildlife product is shipped |
| purpose          | The reason the wildlife product is being imported                  |
| source           | The type of source within the origin country (e.g., wild, bred)    |
| action           | Action taken by USFWS on import ((C)leared/(R)efused)              |
| disposition      | Fate of the import                                                 |
| disposition_date | Full date when disposition occurred                                |
| disposition_year | Year when disposition occurred (derived from 'disposition_date')   |
| shipment_date    | Full date when the shipment arrived                                |
| shipment_year    | Year when the shipment arrived (derived from 'shipment_date')      |
| import_export    | Whether the shipment is an (I)mport or (E)xport                    |
| port             | Port or region of shipment entry                                   |
| us_co            | US party of the shipment                                           |
| foreign_co       | Foreign party of the shipment                                      |
| cleaning_notes   | Notes generated during data cleaning                               |

444
